# Supplementary material for: Academic and Social Functioning Associated with Attention-Deficit/Hyperactivity Disorder: Latent Class Analyses of Trajectories from Kindergarten to Fifth Grade
Source: Springer Nature journal article supplement (doi:10.1007/s10802-016-0126-z), 2016-01-11
Supplement: MOESM3 [file 7094008]

Supplementary Materials Table 3

*Dual Trajectory Analyses for Math and Interpersonal Skills*

| **Probability of Interpersonal Skills conditional on Math** | Interpersonal Skills Class 1 | Interpersonal Skills Class 2 | Interpersonal Skills Class 3 | Interpersonal Skills Class 4 |
| --- | --- | --- | --- | --- |
| Math Class 1 | .616 | .297 | .086 | .000 |
| Math Class 2 | .620 | .146 | .000 | .234 |
| Math Class 3 | .390 | .223 | .252 | .134 |
| Math Class 4 | .055 | .271 | .373 | .301 |
| Math Class 5 | .092 | .287 | .359 | .261 |
| Math Class 6 | .266 | .389 | .107 | .238 |
| Math Class 7 | .237 | .258 | .247 | .257 |
| Math Class 8 | .157 | .226 | .356 | .262 |

*Note.* Values in each row add up to 1.0.

| **Probability of Math conditional on Interpersonal Skills** | Interpersonal Skills Class 1 | Interpersonal Skills Class 2 | Interpersonal Skills Class 3 | Interpersonal Skills Class 4 |
| --- | --- | --- | --- | --- |
| Math Class 1 | .189 | .076 | .021 | .000 |
| Math Class 2 | .143 | .028 | .000 | .052 |
| Math Class 3 | .178 | .086 | .094 | .059 |
| Math Class 4 | .042 | .175 | .234 | .222 |
| Math Class 5 | .111 | .291 | .353 | .302 |
| Math Class 6 | .069 | .085 | .023 | .060 |
| Math Class 7 | .218 | .199 | .185 | .227 |
| Math Class 8 | .049 | .060 | .091 | .079 |

*Note.* Values in each column add up to 1.0.
